# Supplementary material for: Systematic Review of Economic Evaluations of Preparedness Strategies and Interventions against Influenza Pandemics
Source: PLOS journal article supplement (doi:10.1371/journal.pone.0030333), 2012-02-29
Supplement: S1 (10.1371/journal.pone.0030333.s001) [file journal.pone.0030333.s001]

| **Table S1** Searches performed on electronic sources of information | |
| --- | --- |
| **Sources of information**  **(search conducted on 22.09.2011)** | **Search records** |
| 1. MEDLINE (via PubMed, 1950-22.09.2011)   *(see appendix* 1 *for detailed search strategy)* | 295 |
| 1. NHS EED (via CRD, 1992-22.09.2011)   *(MeSH Influenza A Virus, H1N1 Subtype) OR (pandemic NEAR influenza) OR H1N1* | 34 |
| 1. HEED (via Wiley Online Library, 1992-08.2011)   *pandemic AND (influenza OR flu OR H1N1)* | 30 |
| 1. CEA Registry (1976-2010)   *influenza* | 46 |
| 1. EURONHEED (via INSERM, 1980-2010)   *grip$ OR flu OR influenza* | 34 |
| 1. HTA (via CRD, 1988-22.09.2011)   *(MeSH Influenza A Virus, H1N1 Subtype) OR (pandemic NEAR influenza) OR H1N1* | 27 |
| 1. HEN (via WHO/Europe, on 22.09.2011)   *Topic: influenza, Source: all* | 24 |
| 1. EconLit (via Ovid, 1969-08.2011)   *pandemic AND (influenza OR H1N1)* | 39 |
| 1. RePEc (via Ideas, 1990-22.09.2011)   *(pandemic | pandemia) + (flu | influenza | grippe | gripe) + (cost | economic | coste | kosten | cost-effective | coste-efectivo | kosten-effektiv )*  *Limits: articles, papers, chapters and books* | 22 |
| SSCI (via ISI Web of Knowledge, 1970-22.09.2011)  *pandemic AND (influenza OR H1N1) AND (cost* OR economic* OR cost-effective*)* | 98 |
| Google (www.google.co.uk, on 06.10.2010 and 22.09.2011)  *pandemic "cost effective" influenza OR H1N1 OR flu*  *(domains .ac, .edu, .gov, .mil, .int, .org, .pdf -past year)* | 248**†** |
| Scirus (www.scirus.com, 2009-22.09.2011)  *pandemic AND (influenza OR H1N1 OR flu)) ("cost-effective" OR economic OR costs)*  *(Sections: conferences, thesis and dissertations)* | 262 |
| Web of Science (via ISI Web of Knowledge, 1970-22.09.2011) cited reference search for:  *Meltzer et al* [5] | 233 |

***** Word truncationsymbol

**†** 20 best matches of each search were screened
